# Supplementary material
Source: publisher site journal article supplement (https://www.dovepress.com/article/357540)

## Supplementary Material

**Supplementary Table 1:** Charlson Comorbidity Score (CCI) and components

| Comorbidity                                                    | ICD-10 Code                                                           | Charlson Score |
|----------------------------------------------------------------|-----------------------------------------------------------------------|----------------|
| Coronary heart disease                                         | I20-, I21-, I22-, I23-, I24-, I25-                                    | 1              |
| Congestive heart failure                                       | I11-, I50-                                                            | 1              |
| Peripheral vascular disease                                    | I73-, I74-, I77-                                                      | 1              |
| Cerebrovascular disease                                        | G45-, G46-, I6-                                                       | 1              |
| Dementia                                                       | F00-, F01-, F02-, F03-, G30-                                          | 1              |
| Chronic pulmonary disease                                      | J4-, J6- w/o J67-, J68-, J69-                                         | 1              |
| Connective tissue disorder                                     | M05-, M06-, M07-, M08-, M3-                                           | 1              |
| Peptic ulcer disease                                           | K25-, K26-, K27-, K28-                                                | 1              |
| Mild liver disease                                             | B18-, K70-, K73-, K75-                                                | 1              |
| Diabetes mellitus without complications                        | E109-, E119-, E129-, E139-, E149-                                     | 1              |
| Hemiplegia                                                     | G81-, G82-                                                            | 2              |
| Moderate or severe renal disease                               | N17-, N18-, N19-                                                      | 2              |
| Diabetes mellitus with end-organ damage                        | E10-, E11-, E12-, E13-, E14-                                          | 2              |
| Tumor without metastases, leukemia, lymphoma, multiple myeloma | C- w/o [No 16]                                                        | 2              |
| Moderate or severe liver disease                               | K72-, K74-, I85-                                                      | 3              |
| Metastatic solid tumor                                         | C77-, C78-, C79-, C80-                                                | 6              |
| AIDS                                                           | B20-, B21-, B22-, B23-, B24-                                          | 6              |
| Age factor (excluded)                                          | For each decade $\geq 50$ years of age, 1 point is added to the score |                |

**Supplementary Table 2:** List of covariates included in the PSM logistic regression

| Covariate                      | Description                                                                                                                                                           | Metric                                                    |
|--------------------------------|-----------------------------------------------------------------------------------------------------------------------------------------------------------------------|-----------------------------------------------------------|
| Sex                            | Proportion of female patients at index date                                                                                                                           | 0, male; 1, female                                        |
| Age                            | Mean age at index date                                                                                                                                                | Years                                                     |
| CCI                            | Mean score; points per diagnosed complication within BL period (Supplementary Table 1), excluding age factor                                                          | 0-33 points                                               |
| Level of care                  | Proportion of patients with documented level of care (1-5)                                                                                                            | 0 if none, binary variable per level                      |
| Major cardiovascular disease   | Any diagnosis with ICD-10 codes for myocardial infarction, heart failure, CHD, or ischemic stroke (I11.0, I13.0/2, I21, I25, I50, or I63)                             | 0 if none; 1 if at least once diagnosed within BL period  |
| Kidney disease                 | Any diagnosis with ICD-10 codes for acute or chronic kidney disease (N17-19)                                                                                          | 0 if none; 1 if at least once diagnosed within BL period  |
| Documented alcohol abuse       | Any diagnosis with ICD-10 codes for alcohol related disorders or documented abuse counseling (F10, G62.1, K70, I42.6, or Z71.4)                                       | 0 if none; 1 if at least once diagnosed within BL period  |
| Documented nicotine dependence | Any diagnosis with ICD-10 codes for nicotine dependence, toxic effects, or documented abuse counseling (F17, T65.2, or Z72.0)                                         | 0 if none; 1 if at least once diagnosed within BL period  |
| Insulin                        | Proportion of patients with >1 prescription of insulin (ATC A10A-)                                                                                                    | 0 if none; 1 if at least once prescribed within BL period |
| Metformin                      | Proportion of patients with >1 prescription of metformin (ATC A10BA-)                                                                                                 | 0 if none; 1 if at least once prescribed within BL period |
| Sulfonylureas                  | Proportion of patients with >1 prescription of sulfonylureas (ATC A10BB-)                                                                                             | 0 if none; 1 if at least once prescribed within BL period |
| Other antidiabetic drugs       | Proportion of patients with >1 prescription of glinides, thiazolidinediones or other blood glucose lowering drugs (ATC A10B-; excl. agents listed above)              | 0 if none; 1 if at least once prescribed within BL period |
| Antithrombotic agents          | Proportion of patients with >1 prescription of heparin, VKA, non-VKA anticoagulants, and other platelet aggregation inhibitors (ATC B01-)                             | 0 if none; 1 if at least once prescribed within BL period |
| RAAS inhibitors                | Proportion of patients with >1 prescription of ACE inhibitors and/or angiotensin II receptor blockers (ATC C09-)                                                      | 0 if none; 1 if at least once prescribed within BL period |
| Beta blockers                  | Proportion of patients with >1 prescription of Beta blocking agents (ATC C07-)                                                                                        | 0 if none; 1 if at least once prescribed within BL period |
| Calcium channel blockers       | Proportion of patients with >1 prescription of Calcium channel blocking agents (ATC C08-)                                                                             | 0 if none; 1 if at least once prescribed within BL period |
| Lipid lowering drugs           | Proportion of patients with >1 prescription of statins, ezetimibe, PCSK9 inhibitors, fibrates, bile acid sequestrants, and/or other lipid modifying agents (ATC C10-) | 0 if none; 1 if at least once prescribed within BL period |

**Supplementary Figure 1: Total direct cost by pre-specified initiated therapy combinations**

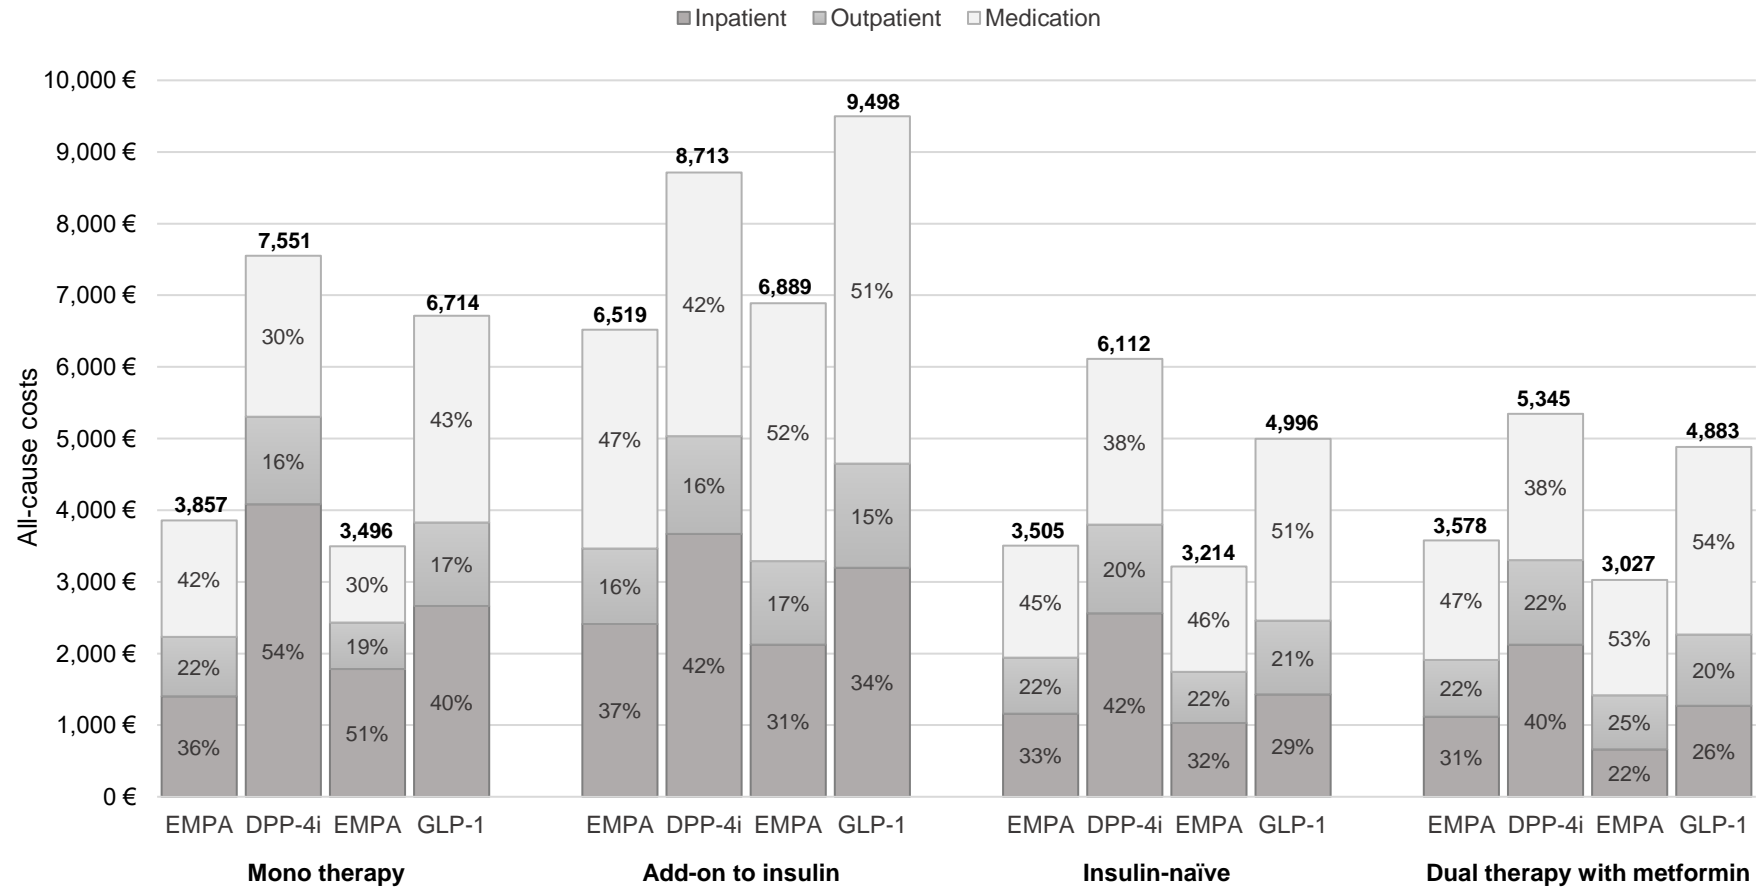

**Supplementary Figure 2:** Total direct cost by initiated agent (EMPA vs. DULA; EMPA vs. LIRA)

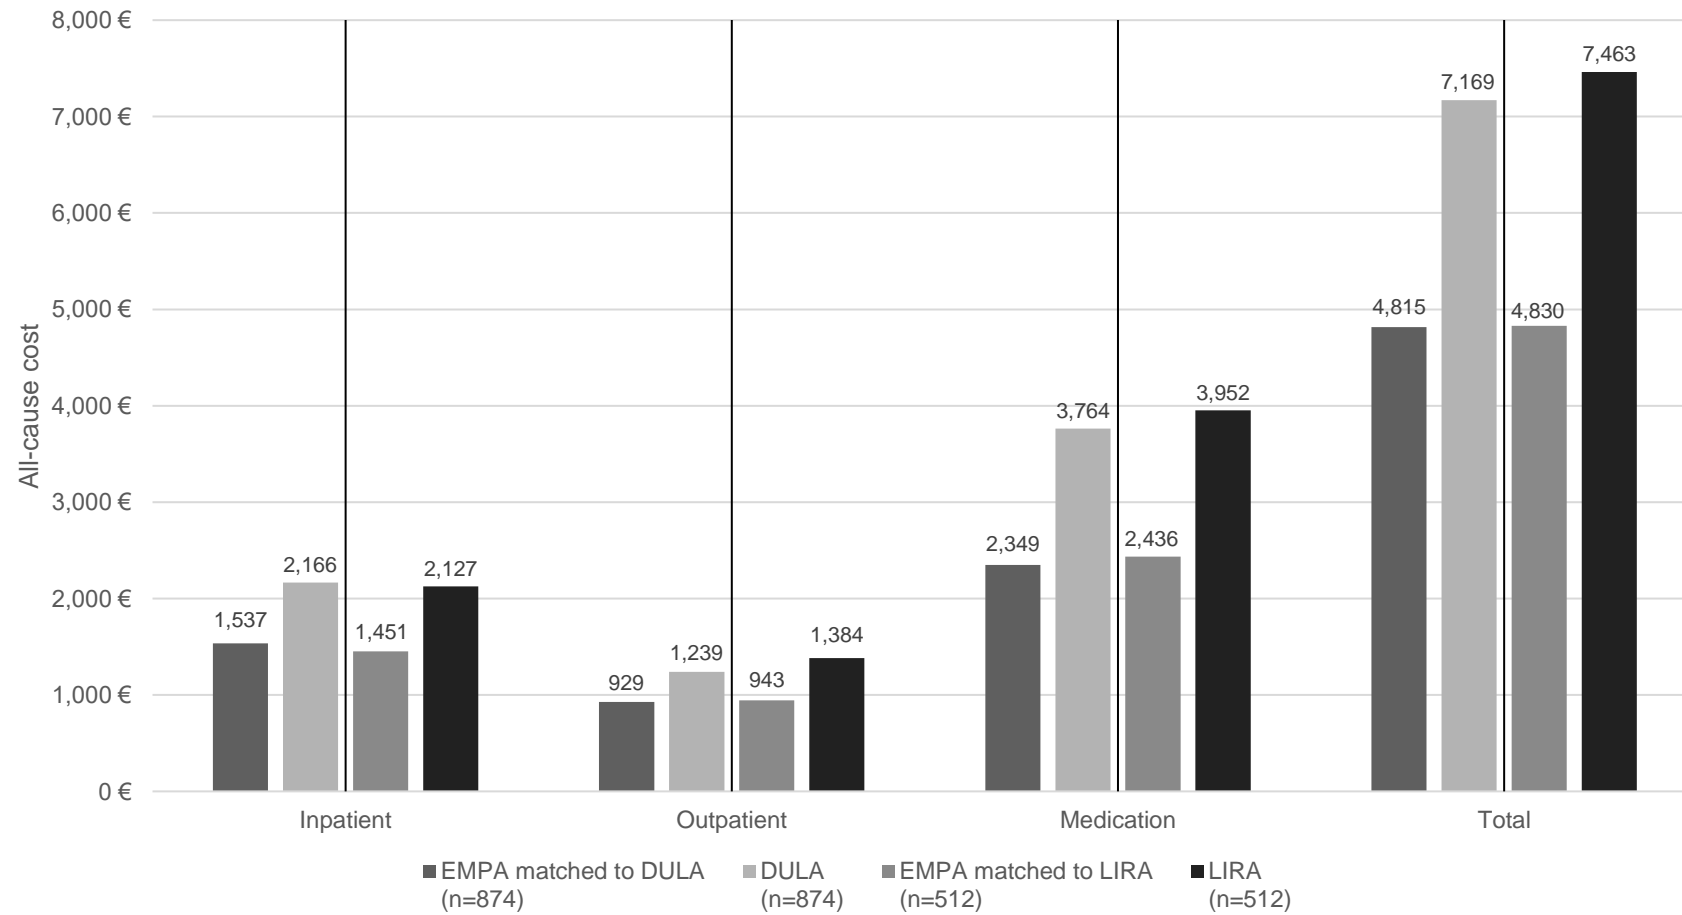

**Supplementary Figure 3:** Total direct cost of any cause within first year of treatment (matched cohorts)

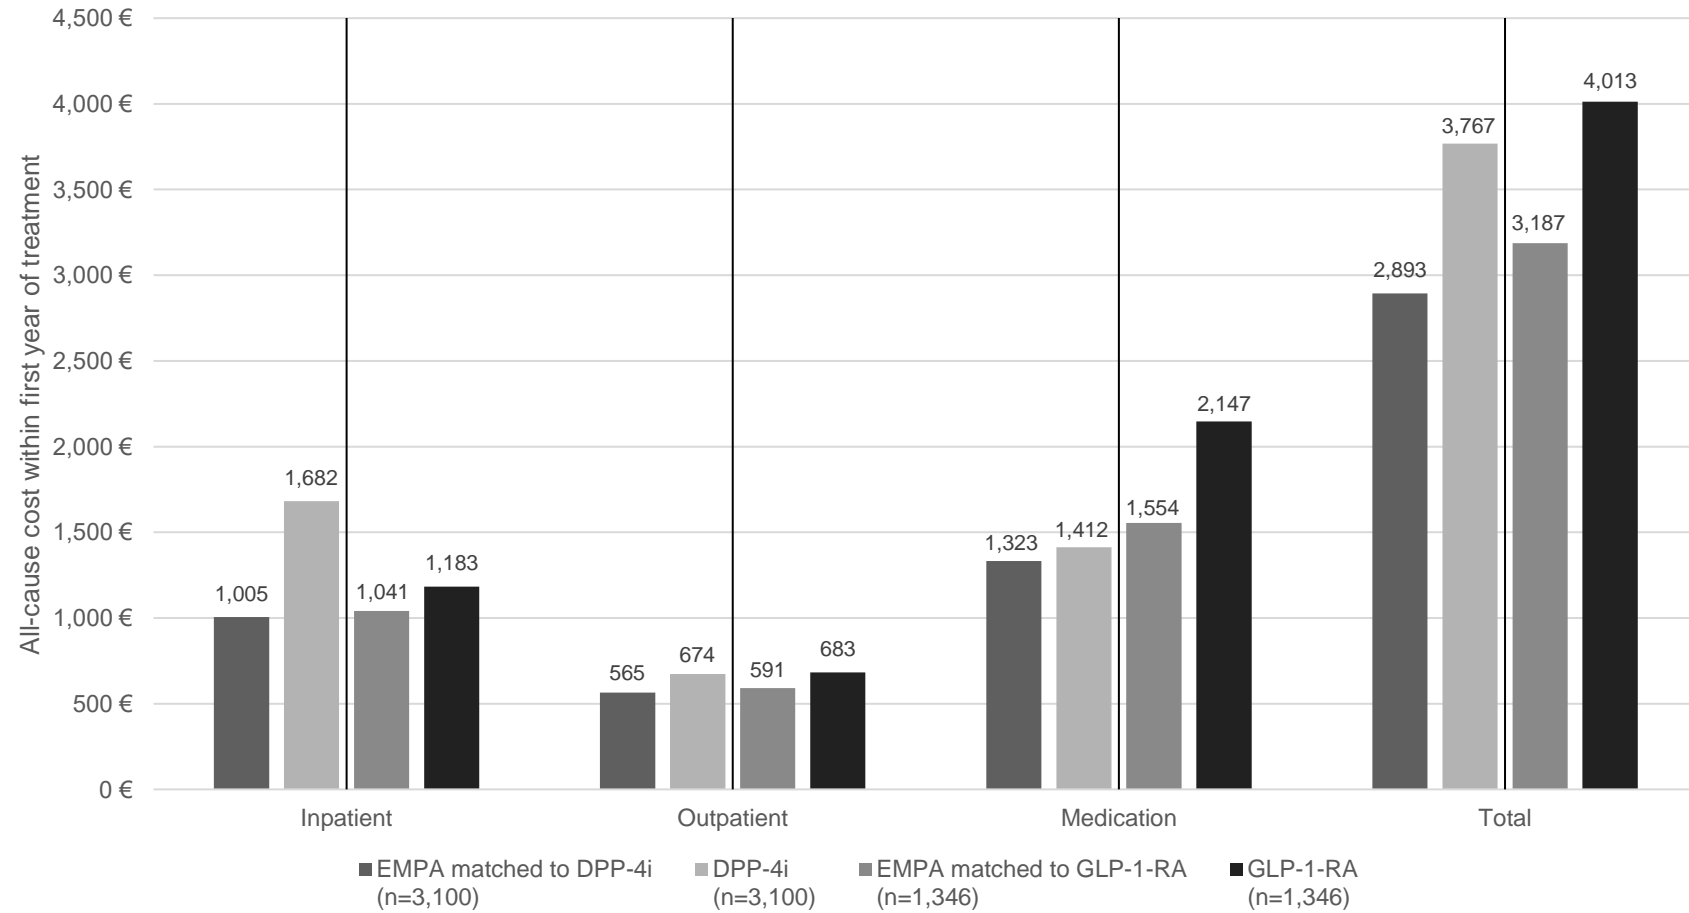

Supplement: Supplementary file 1 [file get_supplementary_file.php]
